# Supplementary material
Source: MDPI journal article supplement (https://www.mdpi.com/1999-4907/9/2/62)
Supplement: s1 [file s1]

## Supplementary material

Table S1 – Root variables obtained from root imaging and *Safira*® software processing ( $n=1$ ).

| <b>N level</b>      | <b>Root variables</b>                |                                               |
|---------------------|--------------------------------------|-----------------------------------------------|
| kg ha <sup>-1</sup> | <b>Length</b> (cm cm <sup>-3</sup> ) | <b>SRA</b> (m <sup>2</sup> kg <sup>-1</sup> ) |
| 24                  | 1.41                                 | 19.89                                         |
| 36                  | 1.35                                 | 17.35                                         |
| 48                  | 1.76                                 | 20.38                                         |
| 108                 | 1.38                                 | 21.29                                         |

SRA: Specific root area.

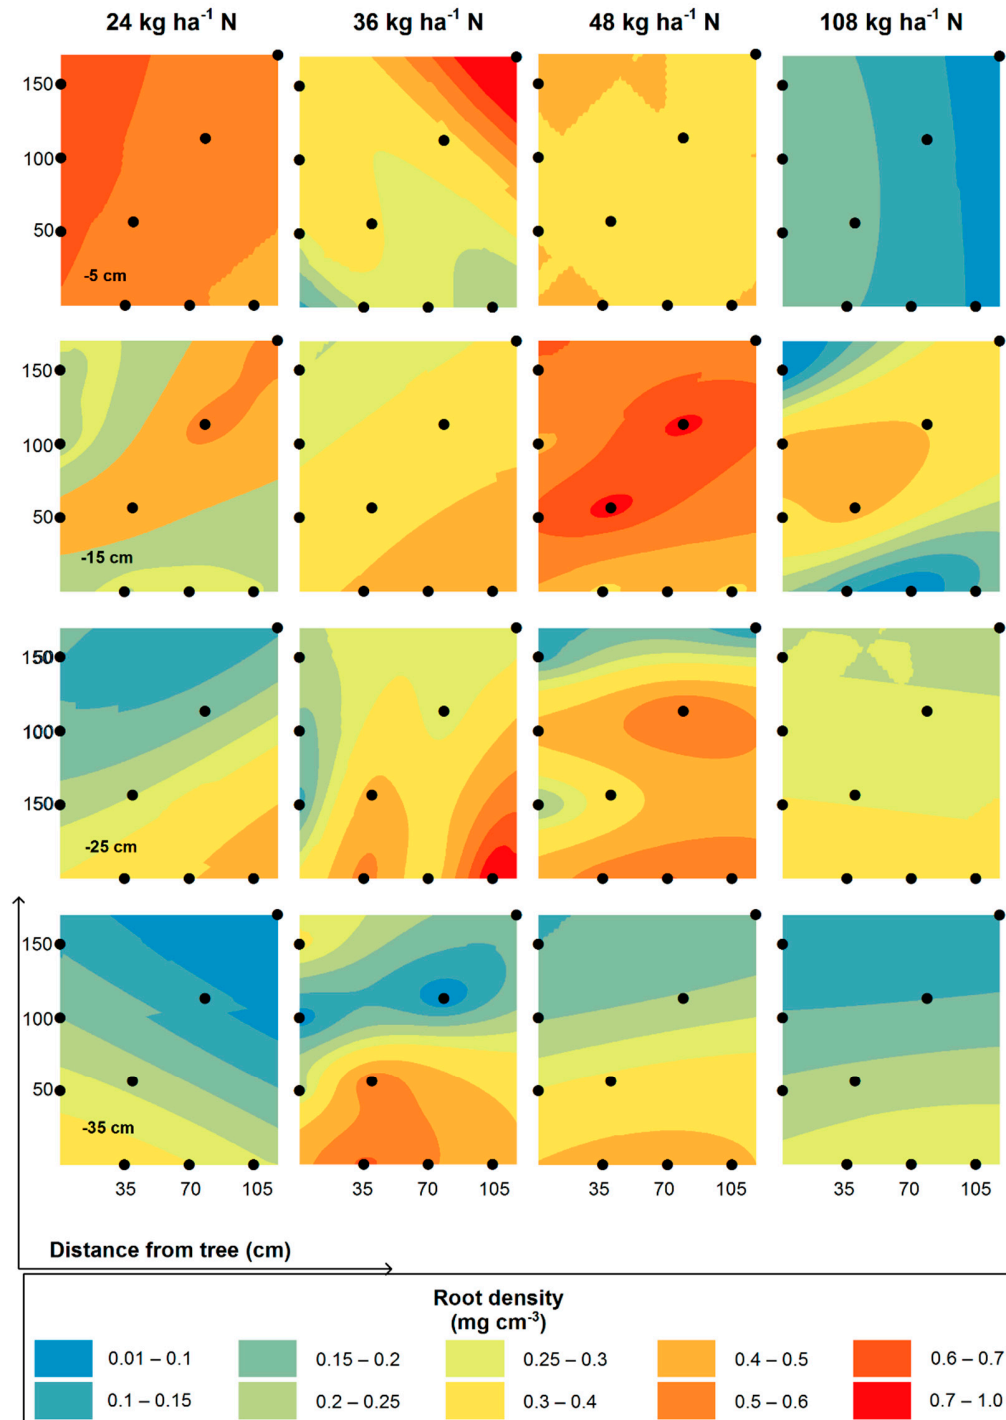

Figure S1 – Ordinary kriging of average fine-root density (FRD) distribution of 2.95-year-old *E. dunnii* plantations, in the four N rates tested, across the four depths evaluated (0-10: -5 cm; 10-20: -15 cm; 20-30: -25 cm; 30-40: -35 cm). Trees are placed in the bottom left corner of each figure. Axis represent increasing distance from trees: x axis represents row position, y axis represents inter-row position and diagonal is represented at 45° between row and inter-row.
